# Supplementary material
Source: PubMed Central journal article supplement (PMC3927539)

**Supporting Information for:**

Light Activation of *Staphylococcus aureus* Toxin YoeB<sub>Sa1</sub> Reveals Guanosine-Specific  
Endoribonuclease Activity

*Amy S. Larson and Paul J. Hergenrother*

Department of Chemistry, University of Illinois at Urbana-Champaign, Urbana, IL 61801

**Table S1.** Sequences of primers used in this study.

| Primer                              | Sequence                                                   |
|-------------------------------------|------------------------------------------------------------|
| PP1QC1F                             | 5'-CTTGCCTTATCTACTTTTCTAGAGGGCCCTATTC-3'                   |
| PP1QC1R                             | 5'-GAATAGGGCCCTCTAGAAAAGTAAGATAAGGCAAG-3'                  |
| PP1QC2F                             | 5'-CTTGGTACCGGAATTCTACGAATTTTCTTTTGTATTTC-3'               |
| PP1QC2R                             | 5'-GAAATAAACAAAAGAAAAATTCGTAGAATCCGGTACCAAG-3'             |
| PP2QCF                              | 5'-GTTGCGCTCTATTCTTCTAGAGGGCCCTATTC-3'                     |
| PP2QCR                              | 5'-GAATAGGGCCCTCTAGAAGAATAGAGCGCAAC-3'                     |
| PP4QCF                              | 5'-GCCCTAATCCCACTCTAGAGGGCCCTATTC-3'                       |
| PP4QCR                              | 5'-GAATAGGGCCCTCTAGAGTGGGATTAGGGC-3'                       |
| PP6QCF                              | 5'-GGTACGGGATCCCTCTAGAGGGCCC-3'                            |
| PP6QCR                              | 5'-GGGCCCTCTAGAGGGATCCCGTACC-3'                            |
| PP7QCF                              | 5'-GAAAAATTCGTAGAATTCCTCTAGAGGGCCCTATTC-3'                 |
| PP7QCR                              | 5'-GAATAGGGCCCTCTAGAGGAATTCTACGAATTTTTC-3'                 |
| PP8QCF                              | 5'-GAAACTAAAGTAAGATTCTAGAGGGCCCTATTCTATAGTG-3'             |
| PP8QCR                              | 5'-CACTATAGAATAGGGCCCTCTAGAATCTTACTTTAGTTTC-3'             |
| PP9QCF                              | 5'-GACAGTAGAATAGAGCTCTAGAGGGCCCTATTC-3'                    |
| PP9QCR                              | 5'-GAATAGGGCCCTCTAGAGCTCTATTCTACTGTC-3'                    |
| PP10QCF                             | 5'-CCAATGGGTAGGATTCTAGAGGGCCCTATTC-3'                      |
| PP10QCR                             | 5'-GAATAGGGCCCTCTAGAATCCTACCCATTGG-3'                      |
| PP12QCF                             | 5'-GACTCCAACCTCATCTAGAGGGCCCTATTC-3'                       |
| PP12QCR                             | 5'-GAATAGGGCCCTCTAGATGAGGTTGGAGTC-3'                       |
| YefM <sub>Sa1</sub> -NdeI-F         | 5'-GCGATACATATGATTATTA-3'                                  |
| YefM <sub>Sa1</sub> -QC-F           | 5'-GACAAAAGTAAATGATGATAGTGATATGGTAACTGTAACATCTACTG-3'      |
| YefM <sub>Sa1</sub> -QC-R           | 5'-CAGTAGATGTTACAGTTACCATATCACTATCATCATTTACTTTTGTC-3'      |
| YefM <sub>Sa1</sub> -XhoI-R         | 5'-AAAATTCTCGAGTTATTATTATTATACATCTATATCTTTCGTTATAGTTTTC-3' |
| YefM <sub>Sa2</sub> -NdeI-F         | 5'-AAAAAACATATGATTATCACTAGCCCTAC-3'                        |
| YefM <sub>Sa2</sub> -HindIII-R      | 5'-AAAAAAAAGCTTAAAGATTATCCCAATCAATATCATC-3'                |
| YefM-YoeB <sub>Sa1</sub> -F         | 5'-CGCTCGACAGAATTTAAAGG-3'                                 |
| YefM-YoeB <sub>Sa1</sub> -R         | 5'-CCTTCCAATGCACCATTTC-3'                                  |
| YefM-YoeB <sub>Sa2</sub> -F         | 5'-GGTATAGACGACCCTGTGCTG-3'                                |
| YefM-YoeB <sub>Sa2</sub> -R         | 5'-GCCCTACAGAAGCGAGAAAAG-3'                                |
| YoeB <sub>Sa1</sub> -HindIII-R      | 5'-AAAAAAAAGCTTAAATAATGGTATTTACATGATGCTAT-3'               |
| YoeB <sub>Sa1</sub> -NdeI-F         | 5'-AAAAAACATATGGCTAGGTTAAATATTACGT-3'                      |
| YoeB <sub>Sa1</sub> -Y88F-HindIII-R | 5'-AAAAAAAAGCTTAAAAATGGTATTTACATGATGCTAT-3'                |
| YoeB <sub>Sa1</sub> -Y88X-HindIII-R | 5'-AAAAAAAAGCTTACTAATGGTATTTACATGATGC-3'                   |
| YoeB <sub>Sa2</sub> -NdeI-F         | 5'-AAAAGTCATATGAGCAATTACACGGTTAAG-3'                       |
| YoeB <sub>Sa2</sub> -HindIII-R      | 5'-AAAAAAAAGCTTAATCATAATGTGACCATGC-3'                      |

**Table S2.** PCR results with MRSA total genomic DNA. Hospital 1 is Carle Foundation Hospital (Urbana, IL), Hospital 2 is Delnor Community Hospital (Geneva, IL), Hospital 3 is Memorial Medical Center (Springfield, IL), and NARSA is Network on Antimicrobial Resistance in *Staphylococcus aureus*.

| Isolate    | Toxin-Antitoxin System         |                                | Isolate | Toxin-Antitoxin System         |                                |
|------------|--------------------------------|--------------------------------|---------|--------------------------------|--------------------------------|
|            | <i>yefM-yoeB<sub>Sa1</sub></i> | <i>yefM-yoeB<sub>Sa2</sub></i> |         | <i>yefM-yoeB<sub>Sa1</sub></i> | <i>yefM-yoeB<sub>Sa2</sub></i> |
| Hospital 1 |                                |                                | S5      | (+)                            | (+)                            |
| C1         | (+)                            | (+)                            | S6      | (+)                            | (+)                            |
| C2         | (+)                            | (+)                            | S7      | (+)                            | (+)                            |
| C3         | (+)                            | (+)                            | S8      | (+)                            | (+)                            |
| C4         | (+)                            | (+)                            | S9      | (+)                            | (+)                            |
| C5         | (+)                            | (+)                            | S10     | (+)                            | (+)                            |
| C6         | (+)                            | (+)                            | S11     | (+)                            | (+)                            |
| C7         | (+)                            | (+)                            | S12     | (+)                            | (+)                            |
| C8         | (+)                            | (+)                            | S13     | (+)                            | (+)                            |
| C9         | (+)                            | (+)                            | S14     | (+)                            | (+)                            |
| C10        | (+)                            | (+)                            | S15     | (+)                            | (+)                            |
| C11        | (+)                            | (+)                            | S16     | (+)                            | (+)                            |
| C12        | (+)                            | (+)                            | S17     | (+)                            | (+)                            |
| C13        | (+)                            | (+)                            | S18     | (+)                            | (+)                            |
| C14        | (+)                            | (+)                            | S19     | (+)                            | (+)                            |
| C15        | (+)                            | (+)                            | S20     | (+)                            | (+)                            |
| C16        | (+)                            | (+)                            | S21     | (+)                            | (+)                            |
| C17        | (+)                            | (+)                            | S22     | (+)                            | (+)                            |
| C18        | (+)                            | (+)                            | S23     | (+)                            | (+)                            |
| C19        | (+)                            | (+)                            | S24     | (+)                            | (+)                            |
| C21        | (+)                            | (+)                            | S25     | (+)                            | (+)                            |
| C26        | (+)                            | (+)                            | S26     | (+)                            | (+)                            |
| Hospital 2 |                                |                                | NARSA   |                                |                                |
| G1         | (+)                            | (+)                            | NRS3    | (+)                            | (+)                            |
| G2         | (+)                            | (+)                            | NRS4    | (+)                            | (+)                            |
| G3         | (+)                            | (+)                            | NRS17   | (+)                            | (+)                            |
| G4         | (+)                            | (+)                            | NRS18   | (+)                            | (+)                            |
| G5         | (+)                            | (+)                            | NRS21   | (+)                            | (+)                            |
| G6         | (+)                            | (+)                            | NRS22   | (+)                            | (+)                            |
| G8         | (+)                            | (+)                            | NRS23   | (+)                            | (+)                            |
| G9         | (+)                            | (+)                            | NRS24   | (+)                            | (+)                            |
| G10        | (+)                            | (+)                            | NRS26   | (+)                            | (+)                            |
| G11        | (+)                            | (+)                            | NRS27   | (-)                            | (-)                            |
| G12        | (+)                            | (+)                            | NRS28   | (+)                            | (+)                            |
| G13        | (+)                            | (+)                            | NRS29   | (+)                            | (+)                            |
| G14        | (+)                            | (+)                            | NRS51   | (+)                            | (+)                            |
| Hospital 3 |                                |                                | NRS68   | (+)                            | (+)                            |
| S1         | (+)                            | (+)                            | NRS73   | (+)                            | (+)                            |
| S2         | (+)                            | (+)                            | NRS74   | (+)                            | (+)                            |
| S3         | (+)                            | (+)                            | NRS76   | (+)                            | (+)                            |
| S4         | (+)                            | (+)                            | NRS382  | (+)                            | (+)                            |

**Figure S1.** Clustal W multiple sequence alignment of *yefM-yoeB<sub>SaI</sub>* PCR products from 9 of the 77 clinical MRSA strains found to contain *yefM-yoeB<sub>SaI</sub>* by PCR. Bases highlighted in bold on the reference sequence from the *S. aureus* COL genome indicate the location of the primers used to detect the *yefM-yoeB<sub>SaI</sub>* sequence.

```

COL_MBSa1      TTAATAATGGTATTTACATGATGCTATTTTTATATGATTGTCATCTACTGTATAAACCAA
C2             -----
C6             -----
G1             -----
G8             -----
S10           -----
S22           -----
NRS28         -----
NRS51         -----
NRS68         -----

COL_MBSa1      TCTATGTTTCGTGATTGATACGTCTACTATAATACCCAGTCAGATTTCGATTTTAACTTTTC
C2             -----
C6             -----
G1             -----
G8             -----
S10           -----
S22           -----
NRS28         -----
NRS51         -----
NRS68         -----

COL_MBSa1      AGGCTTACCTATACCCTTCCAATGCACCATTTCTGTCAATACTTTTAAGTAACTCATTAAT
C2             -----CCTTCCAATGCACCATTTCGTCAATACTTTTAAGTAACTCATTAAT
C6             -----CCTTCCAATGCACCATTTCGTCAATACTTTTAAGTAACTCATTAAT
G1             -----CCTTCCAATGCACCATTTCGTCAATACTTTTAAGTAACTCATTAAT
G8             -----CCTTCCAATGCACCATTTCGTCAATACTTTTAAGTAACTCATTAAT
S10           -----CCTTCCAATGCACCATTTCGTCAATACTTTTAAGTAACTCATTAAT
S22           -----CCTTCCAATGCACCATTTCGTCAATACTTTTAAGTAACTCATTAAT
NRS28         -----CCTTCCAATGCACCATTTCGTCAATACTTTTAAGTAACTCATTAAT
NRS51         -----CCTTCCAATGCACCATTTCGTCAATACTTTTAAGTAACTCATTAAT
NRS68         -----CCTTCCAATGCACCATTTCGTCAATACTTTTAAGTAACTCATTAAT
                *****

COL_MBSa1      CTTCTTCACCATTTTTTTT-ATCGTTCTGCTGAAAATACTTATAATCTTCAAAGGCTTGAG
C2             CTTCTTCACCATTTTTTTT-ATCGTTCTGCTGAAAATACTTATAATCTTCAAAGGCTTGAG
C6             CTTCTTCACCATTTTTTTT-ATTGTTCTGCTGAAAATACTTATAATCTTCAAAGGCTTGAG
G1             CTTCTTCACCATTTTTTTTATTGTTCTGCTGAAAATACTTATAATCTTCAAAGGCTTGAG
G8             CTTCTTCACCATTTTTTTT-ATCGTTCTGCTGAAAATACTTATAATCTTCAAAGGCTTGAG
S10           CTTCTTCACCATTTTTTTT-ATTGTTCTGCTGAAAATACTTATAATCTTCAAAGGCTTGAG
S22           CTTCTTCACCATTTTTTTT-ATCGTTCTGCTGAAAATACTTATAATCTTCAAAGGCTTGAG
NRS28         CTTCTTCACCATTTTTTTT-ATCGTTCTGCTGAAAATACTTATAATCTTCAAAGGCTTGAG
NRS51         CTTCTTCACCATTTTTTTT-ATCGTTCTGCTGAAAATACTTATAATCTTCAAAGGCTTGAG
NRS68         CTTCTTCACCATTTTTTTT-ATTGTTCTGCTGAAAATACTTATAATCTTCAAAGGCTTGAG
                ***** ** *****

COL_MBSa1      GCGAAAACGTAATATTTAACCTAGCCATTATACATCTATATCTTTCGTTATAGTTTTCC
C2             GCGAAAACGTAATATTTAACCTAGCCATTATACATCTATATCTTTCGTTATAGTTTTCC
C6             GCGAAAACGTAATATTTAACCTAGCCATTATACATCTATATCTTTCGTTATAGTTTTCC
G1             GCGAAAACGTAATATTTAACCTAGCCATTATACATCTATATCTTTCGTTATAGTTTTCC
G8             GCGAAAACGTAATATTTAACCTAGCCATTATACATCTATATCTTTCGTTATAGTTTTCC
S10           GCGAAAACGTAATATTTAACCTAGCCATTATACATCTATATCTTTCGTTATAGTTTTCC
S22           GCGAAAACGTAATATTTAACCTAGCCATTATACATCTATATCTTTCGTTATAGTTTTCC
NRS28         GCGAAAACGTAATATTTAACCTAGCCATTATACATCTATATCTTTCGTTATAGTTTTCC
NRS51         GCGAAAACGTAATATTTAACCTAGCCATTATACATCTATATCTTTCGTTATAGTTTTCC
NRS68         GCGAAAACGTAATATTTAACCTAGCCATTATACATCTATATCTTTCGTTATAGTTTTCC
                ***** **

```

**Figure S1, cont.**

```
COL_MBSa1      ACGTTCTAGATCTGCAATTGATTGAGCTAAGTGTTTCAGCATTATTTGGGTTCTGTTGGAG
C2             ACGTTCTAGATCTGCAATTGATTGAGCTAAGTGTTTCAGCATTATTTGGATTCTGTTGGAG
C6             ACGTTCTAGATCTGCAATTGATTGAGCTAAGTGTTTCAGCATTATTTGGGTTCTGTTGGAG
G1            ACGTTCTAGATCTGCAATTGATTGAGCTAAGTGTTTCAGCATTATTTGGGTTCTGTTGGAG
G8            ACGTTCTAGATCTGCAATTGATTGAGCTAAGTGTTTCAGCATTATTTGGGTTCTGTTGGAG
S10           ACGTTCTAGATCTGCAATTGATTGAGCTAAGTGTTTCAGCATTATTTGGGTTCTGTTGGAG
S22           ACGTTCTAGATCTGCAATTGATTGAGCTAAGTGTTTCAGCATTATTTGGGTTCTGTTGGAG
NRS28         ACGTTCTAGATCTGCAATTGATTGAGCTAAGTGTTTCAGCATTATTTGGGTTCTGTTGGAG
NRS51         ACGTTCTAGATCTGCAATTGATTGAGCTAAGTGTTTCAGCATTATTTGGGTTCTGTTGGAG
NRS68         ACGTTCTAGATCTGCAATTGATTGAGCTAAGTGTTTCAGCATTATTTGGGTTCTGTTGGAG
*****
```

```
COL_MBSa1      GTAAAGTGTTCATCATGGAGTTATAATCTGATTCTGACATGATTACTACGTTTTTATC
C2             GTAAAGTGTTCATCATGGAGTTATAATCTGATTCTGACATGATTACTACGTTTTTATC
C6             GTAAAGTGTTCATCATGGAGTTATAATCTGATTCTGACATGATTACTACGTTTTTATC
G1            GTAAAGTGTTCATCATGGAGTTATAATCTGATTCTGACATGATTACTACGTTTTTATC
G10           GTAAAGTGTTCATCATGGAGTTATAATCTGATTCTGACATGATTACTACGTTTTTATC
S22           GTAAAGTGTTCATCATGGAGTTATAATCTGATTCTGACATGATTACTACGTTTTTATC
NRS28         GTAAAGTGTTCATCATGGAGTTATAATCTGATTCTGACATGATTACTACGTTTTTATC
NRS51         GTAAAGTGTTCATCATGGAGTTATAATCTGATTCTGACATGATTACTACGTTTTTATC
NRS68         GTAAAGTGTTCATCATGGAGTTATAATCTGATTCTGACATGATTACTACGTTTTTATC
*****
```

```
COL_MBSa1      ATCAGTAGATGTTACAGTTACCATATCACTATCATCATTTACTTTTGTGCATAAAGTGCCTT
C2             ATCAGTAGAGGTTACAGTTACCATATCACTATCATCATTTACTTTTGTGCATAAAGTGCCTT
C6             ATCAGTAGATGTTACAGTTACCATATCACTATCATCATTTACTTTTGTGCATAAAGTGCCTT
G1            ATCAGTAGATGTTACAGTTACCATATCACTATCATCATTTACTTTTGTGCATAAAGTGCCTT
S10           ATAAAGTGTTCATCATGGAGTTATAATCTGATTCTGACATGATTACTACGTTTTTATC
S22           ATAAAGTGTTCATCATGGAGTTATAATCTGATTCTGACATGATTACTACGTTTTTATC
NRS28         ATCAGTAGATGTTACAGTTACCATATCACTATCATCATTTACTTTTGTGCATAAAGTGCCTT
NRS51         ATCAGTAGATGTTACAGTTACCATATCACTATCATCATTTACTTTTGTGCATAAAGTGCCTT
NRS68         ATCAGTAGATGTTACAGTTACCATATCACTATCATCATTTACTTTTGTGCATAAAGTGCCTT
*****
```

| COL_MBSa1 | <b>TAAATTCGTGCGAGCG</b> TATGAATAATTTTAAATAATCAT | Sequence Identity |
|-----------|-------------------------------------------------|-------------------|
| C2        | TAAATTCGTGCGAGCG-----                           | 99%               |
| C6        | TAAATTCGTGCGAGCG-----                           | 99%               |
| G1        | TAAATTCGTGCGAGCG-----                           | 99%               |
| G8        | TAAATTCGTGCGAGCG-----                           | 100%              |
| S10       | TAAATTCGTGCGAGCG-----                           | 99%               |
| S22       | TAAATTCGTGCGAGCG-----                           | 100%              |
| NRS28     | TAAATTCGTGCGAGCG-----                           | 100%              |
| NRS51     | TAAATTCGTGCGAGCG-----                           | 100%              |
| NRS68     | TAAATTCGTGCGAGCG-----                           | 99%               |

\*\*\*\*\*

**Figure S2.** Clustal W multiple sequence alignment of *yefM-yoeB<sub>Sa2</sub>* PCR products from 9 of the 77 clinical MRSA strains found to contain *yefM-yoeB<sub>Sa2</sub>* by PCR. Bases highlighted in bold on the reference sequence from the *S. aureus* COL genome indicate the location of the primers used to detect the *yefM-yoeB<sub>Sa2</sub>* sequence.

```

COL_MBSa2      TTAATCATAATGTGACCATGCCGATAGTATTAATACTTCTTTATTTTCGATCATCTACGGT
C6              -----GGT
C18             -----GGT
G5              -----GGT
G10            -----GGT
G14            -----GGT
S14            -----GGT
S15            -----GGT
NRS28          -----GGT
NRS76          -----GGT
                ***

COL_MBSa2      ATAGACGACCCTGTGCTGATGGTTAATTCTTCTTGAATATCGCTCTAAATATTTAGGCTC
C6              ATAGACGACCCTGTGCTGATGGTTAATTCTTCTTGAATATCGCTCTAAATATTTAGGCTC
C18             ATAGACGACCCTGTGCTGATGGTTAATTCTTCTTGAATATCGCTCTAAATATTTAGGCTC
G5              ATAGACGACCCTGTGCTGATGGTTAATTCTTCTTGAATATCGCTCTAAATATTTAGGCTC
G10            ATAGACGACCCTGTGCTGATGGTTAATTCTTCTTGAATATCGCTCTAAATATTTAGGCTC
G14            ATAGACGACCCTGTGCTGATGGTTAATTCTTCTTGAATATCGCTCTAAATATTTAGGCTC
S14            ATAGACGACCCTGTGCTGATGGTTAATTCTTCTTGAATATCGCTCTAAATATTTAGGCTC
S15            ATAGACGACCCTGTGCTGATGGTTAATTCTTCTTGAATATCGCTCTAAATATTTAGGCTC
NRS28          ATAGACGACCCTGTGCTGATGGTTAATTCTTCTTGAATATCGCTCTAAATATTTAGGCTC
NRS76          ATAGACGACCCTGTGCTGATGGTTAATTCTTCTTGAATATCGCTCTAAATATTTAGGCTC
                *****

COL_MBSa2      TAATTTTTCAAAGATTGTGTTATTTTATACGGATCATTTTTTAAAGTCTCAACAATTTTC
C6              TAATTTTTCAAAGATTGTGTTATTTTATACGGATCATTTTTTAAAGTCTCAACAATTTTC
C18             TAATTTTTCAAAGATTGTGTTATTTTATACGGATCATTTTTTAAAGTCTCAACAATTTTC
G5              TAATTTTTCAAAGATTGTGTTATTTTATACGGATCATTTTTTAAAGTCTCAACAATTTTC
G10            TAATTTTTCAAAGATTGTGTTATTTTATACGGATCATTTTTTAAAGTCTCAACAATTTTC
G14            TAATTTTTCAAAGATTGTGTTATTTTATACGGATCATTTTTTAAAGTCTCAACAATTTTC
S14            TAATTTTTCAAAGATTGTGTTATTTTATACGGATCATTTTTTAAAGTCTCAACAATTTTC
S15            TAATTTTTCAAAGATTGTGTTATTTTATACGGATCATTTTTTAAAGTCTCAACAATTTTC
NRS28          TAATTTTTCAAAGATTGTGTTATTTTATACGGATCATTTTTTAAAGTCTCAACAATTTTC
NRS76          TAATTTTTCAAAGATTGTGTTATTTTATACGGATCATTTTTTAAAGTCTCAACAATTTTC
                *****

COL_MBSa2      TAAAAATGACTTCTTTAAATAAGAATGTTTTATTTTCTTTAAATCTGATTTTCGCTGAATT
C6              TAAAAATGACTTCTTTAAATAAGAATGTTTTATTTTCTTTAAATCTGATTTTCGCTGAATT
C18             TAAAAATGACTTCTTTAAATAAGAATGTTTTATTTTCTTTAAATCTGATTTTCGCTGAATT
G5              TAAAAATGACTTCTTTAAATAAGAATGTTTTATTTTCTTTAAATCTGATTTTCGCTGAATT
G10            TAAAAATGACTTCTTTAAATAAGAATGTTTTATTTTCTTTAAATCTGATTTTCGCTGAATT
G14            TAAAAATGACTTCTTTAAATAAGAATGTTTTATTTTCTTTAAATCTGATTTTCGCTGAATT
S14            TAAAAATGACTTCTTTAAATAAGAATGTTTTATTTTCTTTAAATCTGATTTTCGCTGAATT
S15            TAAAAATGACTTCTTTAAATAAGAATGTTTTATTTTCTTTAAATCTGATTTTCGCTGAATT
NRS28          TAAAAATGACTTCTTTAAATAAGAATGTTTTATTTTCTTTAAATCTGATTTTCGCTGAATT
NRS76          TAAAAATGACTTCTTTAAATAAGAATGTTTTATTTTCTTTAAATCTGATTTTCGCTGAATT
                *****

COL_MBSa2      TTTAATCTTAACCGTGAATTGCTCATTAAAGATTATCCCAATCAATATCATCTATATTT
C6              TTTAATCTTAACCGTGAATTGCTCATTAAAGATTATCCCAATCAATATCATCTATATTT
C18             TTTAATCTTAACCGTGAATTGCTCATTAAAGATTATCCCAATCAATATCATCTATATTT
G5              TTTAATCTTAACCGTGAATTGCTCATTAAAGATTATCCCAATCAATATCATCTATATTT
G10            TTTAATCTTAACCGTGAATTGCTCATTAAAGATTATCCCAATCAATATCATCTATATTT
G14            TTTAATCTTAACCGTGAATTGCTCATTAAAGATTATCCCAATCAATATCATCTATATTT
S14            TTTAATCTTAACCGTGAATTGCTCATTAAAGATTATCCCAATCAATATCATCTATATTT
S15            TTTAATCTTAACCGTGAATTGCTCATTAAAGATTATCCCAATCAATATCATCTATATTT
NRS28          TTTAATCTTAACCGTGAATTGCTCATTAAAGATTATCCCAATCAATATCATCTATATTT
NRS76          TTTAATCTTAACCGTGAATTGCTCATTAAAGATTATCCCAATCAATATCATCTATATTT
                *****

```

**Figure S2, cont.**

```

COL_MBSa2      GTTGTACCACTATTATCTTTTTCTCTTTCTTACTTTGTCCATTGTACCAGTAGATTCA
C6             GTTGTACCACTATTATCTTTTTCTCTTTCTTACTTTGTCCATTGTACCAGTAGATTCA
C18           GTTGTACCACTATTATCTTTTTCTCTTTCTTACTTTGTCCATTGTACCAGTAGATTCA
G5            GTTGTACCACTATTATCTTTTTCTCTTTCTTACTTTGTCCATTGTACCAGTAGATTCA
G10           GTTGTACCACTATTATCTTTTTCTCTTTCTTACTTTGTCCATTGTACCAGTAGATTCA
G14           GTTGTACCACTATTATCTTTTTCTCTTTCTTACTTTGTCCATTGTACCAGTAGATTCA
S14           GTTGTACCACTATTATCTTTTTCTCTTTCTTACTTTGTCCATTGTACCAGTAGATTCA
S15           GTTGTACCACTATTATCTTTTTCTCTTTCTTACTTTGTCCATTGTACCAGTAGATTCA
NRS28         GTTGTACCACTATTATCTTTTTCTCTTTCTTACTTTGTCCATTGTACCAGTAGATTCA
NRS76         GTTGTACCACTATTATCTTTTTCTCTTTCTTACTTTGTCCATTGTACCAGTAGATTCA
*****

COL_MBSa2      AGATATATTGTCTCTTGTATACTTTTCCAATCTTCTAAACCTATAATCACAGCATTATTT
C6            AGATATATTGTCTCTTGTATACTTTTCCAATCTTCTAAACCTATAATCACAGCATTATTT
C18           AGATATATTGTCTCTTGTATACTTTTCCAATCTTCTAAACCTATAATCACAGCATTATTT
G5            AGATATATTGTCTCTTGTATACTTTTCCAATCTTCTAAACCTATAATCACAGCATTATTT
G10           AGATATATTGTCTCTTGTATACTTTTCCAATCTTCTAAACCTATAATCACAGCATTATTT
G14           AGATATATTGTCTCTTGTATACTTTTCCAATCTTCTAAACCTATAATCACAGCATTATTT
S14           AGATATATTGTCTCTTGTATACTTTTCCAATCTTCTAAACCTATAATCACAGCATTATTT
S15           AGATATATTGTCTCTTGTATACTTTTCCAATCTTCTAAACCTATAATCACAGCATTATTT
NRS28         AGATATATTGTCTCTTGTATACTTTTCCAATCTTCTAAACCTATAATCACAGCATTATTT
NRS76         AGATATATTGTCTCTTGTATACTTTTCCAATCTTCTAAACCTATAATCACAGCATTATTT
*****

COL_MBSa2      TCGGCATTATTGCCACTAATATAAAATTGGTTCGTGATTATTATTAACATTTTTTAGTAAT
C6            TCGGCATTATTGCCACTAATATAAAATTGGTTCGTGATTATTATTAACATTTTTTAGTAAT
C18           TCGGCATTATTGCCACTAATATAAAATTGGTTCGTGATTATTATTAACATTTTTTAGTAAT
G5            TCGGCATTATTGCCACTAATATAAAATTGGTTCGTGATTATTATTAACATTTTTTAGTAAT
G10           TCGGCATTATTGCCACTAATATAAAATTGGTTCGTGATTATTATTAACATTTTTTAGTAAT
G14           TCGGCATTATTGCCACTAATATAAAATTGGTTCGTGATTATTATTAACATTTTTTAGTAAT
S14           TCGGCATTATTGCCACTAATATAAAATTGGTTCGTGATTATTATTAAC-----
S15           TCGGCATTATTGCCACTAATATAAAATTGGTTCGTGATTATTATTAACATTTTTTAGTAAT
NRS28         TCGGCATTATTGCCACTAATATAAAATTGGTTCGTGATTATTATTAACATTTTTTAGTAAT
NRS76         TCGGCATTATTGCCACTAATATAAAATTGGTTCGTGATTATTATTAACATTTTTTAGTAAT
*****

COL_MBSa2      TGATAAAAAATCTTTTCTCGCTTCTGTAGGGCTAGTGATAATCAT      Sequence Identity
C6            TGATAAAAAATCTTTTCTCGCTTCTGTAGGGC-----          100%
C18           TGATAAAAAATCTTTTCTCGCTTCTGTAGGGC-----          100%
G5            TGATAAAAAATCTTTTCTCGCTTCTGTAGGGC-----          100%
G10           TGATAAAAAATCTTTTCTCGCTTCTGTAGGGC-----          100%
G14           TGATAAAAAATCTTTTCTCGCTTCTGTAGGGC-----          99%
S14           -----                                          100%
S15           TGATAAAAAATCTTTTCTCGCTTCTGTAGGGC-----          100%
NRS28         TGATAAAAAATCTTTTCTCGCTTCTGTAGGGC-----          99%
NRS76         TGATAAAAAATCTTTTCTCGCTTCTGTAGGGC-----          99%
*****

```

**Figure S3.** MALDI-MS analysis of YoeB<sub>Sa1</sub> specificity toward fluorogenic substrate. Peak fractions were collected from blue HPLC trace in Figure 5B, concentrated, and submitted for MALDI-MS at the University of Illinois Mass Spectrometry Laboratory. *A*, MALDI spectrum of the first elution peak (calculated MW: 3115.0 Da; observed MW: 3115.3 Da). *B*, MALDI spectrum of the early portion of the second elution peak (calculated MW: 2602.8 Da; observed MW: 2602.9 Da). *C*, MALDI spectrum of the later portion of the second elution peak (calculated MW: 2602.8 Da; observed MW: 2604.3 Da).

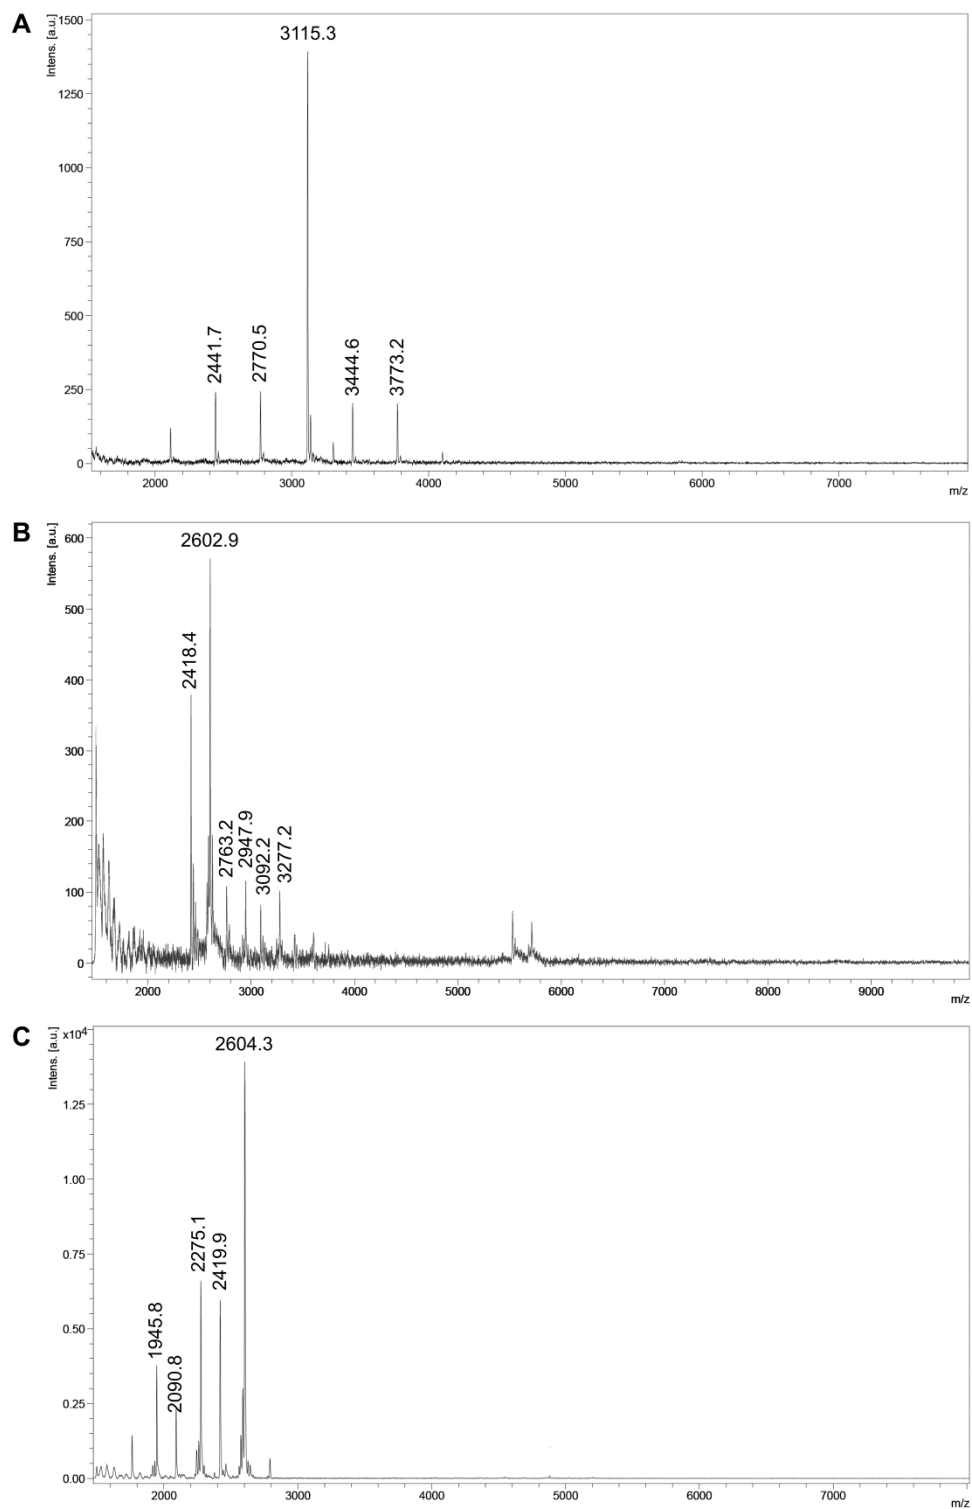

Supplement: NIHMS551806-supplement-1_si_001.pdf [file NIHMS551806-supplement-1_si_001.pdf]
